# Supplementary material for: Mitogenomes Provide Insights into the Species Boundaries and Phylogenetic Relationships among Three Dolycoris Sloe Bugs (Hemiptera: Pentatomidae) from China
Source: MDPI journal article supplement (doi:10.3390/insects15020134), 2024-02-17
Supplement: s1 [file s1]

## Supporting Information

**Table S1.** Sample information of *Dolycoris* species in the present study.

| Species                | Code  | Locality                                                 | Longitude | Latitude | Collection date | Accession number |
|------------------------|-------|----------------------------------------------------------|-----------|----------|-----------------|------------------|
| <i>D. baccarum</i>     | HEBCZ | Zhengzhuangzi village, Caofeidian district, Hebei, China | 118.343   | 39.329   | 2020/6/6        | OQ909509         |
| <i>D. baccarum</i>     | JSPD  | Dishuizhu village, Pukou district, Jiangsu, China        | 118.570   | 32.110   | 2019/7/17       | OQ909510         |
| <i>D. baccarum</i>     | JXLS  | Lu Mountain, Jiujiang city, Jiangxi, China               | 116.009   | 29.557   | 2020/8/1        | OQ909511         |
| <i>D. baccarum</i>     | NMJS  | Shamujia town, Jiuyuan district, Neimenggu, China        | 110.340   | 40.592   | 2017/8/18       | OQ909512         |
| <i>D. baccarum</i>     | QHQQ  | Qingyang Ditch, Qilian county, Qinghai, China            | 100.402   | 38.149   | 2020/8/1        | OQ909513         |
| <i>D. baccarum</i>     | SNZC  | Chenjia Ditch, Zichang county, Shanxi, China             | 109.618   | 36.459   | 2019/8/4        | OQ909514         |
| <i>D. indicus</i>      | YNLJ  | Jiuxi Mountain, Luxi county, Yunnan, China               | 103.685   | 24.414   | 2020/7/29       | OQ909515         |
| <i>D. indicus</i>      | YNNN  | Ninger town, Ninger county, Yunnan, China                | 101.054   | 23.034   | 2021/7/12       | OQ909516         |
| <i>D. indicus</i>      | YNY Y | Yulong village, Yulong county, Yunnan, China             | 100.209   | 26.986   | 2022/7/25       | OQ909517         |
| <i>D. penicillatus</i> | XJBS  | Sailimu Lake, Bole city, Xinjiang, China                 | 81.169    | 44.494   | 2016/8/6        | OQ909518         |
| <i>D. penicillatus</i> | XJHQ  | Qingshuihe town, Huocheng county, Xinjiang, China        | 80.731    | 44.203   | 2016/8/5        | OQ909519         |
| <i>D. penicillatus</i> | XJTP  | Putao Ditch, Tulufan city, Xinjiang, China               | 89.251    | 43.018   | 2016/7/28       | OQ909520         |
| <i>D. penicillatus</i> | XJTS  | Tacheng Forest Park, Tacheng city, Xinjiang, China       | 82.953    | 46.760   | 2016/8/10       | OQ909521         |
| <i>D. penicillatus</i> | XJTY  | Yemenle town, Tacheng city, Xinjiang, China              | 83.076    | 46.657   | 2016/8/9        | OQ909522         |
| <i>D. penicillatus</i> | XJYB  | Balake village, Yining city, Xinjiang, China             | 81.313    | 43.951   | 2016/8/4        | OQ909523         |

**Table S2.** Taxonomic information and GenBank accession numbers of mitochondrial genomes downloaded from GenBank in this study.

| <b>Family</b> | <b>Subfamily</b> | <b>Species</b>                  | <b>Accession number</b> |
|---------------|------------------|---------------------------------|-------------------------|
| Pentatomidae  | Asopinae         | <i>Arma custos</i>              | MT535604                |
| Pentatomidae  | Asopinae         | <i>Cazira horvathi</i>          | NC_042817               |
| Pentatomidae  | Asopinae         | <i>Dinorhynchus dybowskyi</i>   | NC_037724               |
| Pentatomidae  | Asopinae         | <i>Eocanthecona thomsoni</i>    | NC_042816               |
| Pentatomidae  | Asopinae         | <i>Picromerus griseus</i>       | NC_036418               |
| Pentatomidae  | Asopinae         | <i>Zicrona caerulea</i>         | MW847250                |
| Pentatomidae  | Pentatominae     | <i>Carbula sinica</i>           | KY069964                |
| Pentatomidae  | Pentatominae     | <i>Catacanthus incarnatus</i>   | MF497716                |
| Pentatomidae  | Pentatominae     | <i>Caystus obscurus</i>         | MF497717                |
| Pentatomidae  | Pentatominae     | <i>Dalpada cinctipes</i>        | MW847236                |
| Pentatomidae  | Pentatominae     | <i>Erthesina fullo</i>          | JQ743673                |
| Pentatomidae  | Pentatominae     | <i>Eurydema dominulus</i>       | MW847238                |
| Pentatomidae  | Pentatominae     | <i>Eurydema gebleri</i>         | NC_027489               |
| Pentatomidae  | Pentatominae     | <i>Eurydema maracandica</i>     | NC_037042               |
| Pentatomidae  | Pentatominae     | <i>Glaucias dorsalis</i>        | MW847239                |
| Pentatomidae  | Pentatominae     | <i>Halyomorpha halys</i>        | NC_013272               |
| Pentatomidae  | Pentatominae     | <i>Hippotiscus dorsalis</i>     | MW847240                |
| Pentatomidae  | Pentatominae     | <i>Hoplistodera incisa</i>      | MF620037                |
| Pentatomidae  | Pentatominae     | <i>Menida violacea</i>          | MK617948                |
| Pentatomidae  | Pentatominae     | <i>Neojurtina typica</i>        | MW847243                |
| Pentatomidae  | Pentatominae     | <i>Nezara viridula</i>          | NC_011755               |
| Pentatomidae  | Pentatominae     | <i>Pentatoma metallifera</i>    | MW847244                |
| Pentatomidae  | Pentatominae     | <i>Pentatoma semiannulata</i>   | MT985377                |
| Pentatomidae  | Pentatominae     | <i>Placosternum urus</i>        | MF497730                |
| Pentatomidae  | Pentatominae     | <i>Plautia fimbriata</i>        | MF497731                |
| Pentatomidae  | Pentatominae     | <i>Plautia lushanica</i>        | MW847245                |
| Pentatomidae  | Pentatominae     | <i>Rubiconia intermedia</i>     | KP207596                |
| Pentatomidae  | Phyllocephalinae | <i>Dalsira scabrata</i>         | NC_037374               |
| Pentatomidae  | Phyllocephalinae | <i>Gonopsis affinis</i>         | NC_036745               |
| Pentatomidae  | Podopinae        | <i>Graphosoma rubrolineatum</i> | NC_033875               |
| Pentatomidae  | Podopinae        | <i>Scotinophara lurida</i>      | NC_042815               |
| Plataspidae   |                  | <i>Megacopta cribraria</i>      | OP123001                |
| Plataspidae   |                  | <i>Calacta lugubris</i>         | NC_058965               |



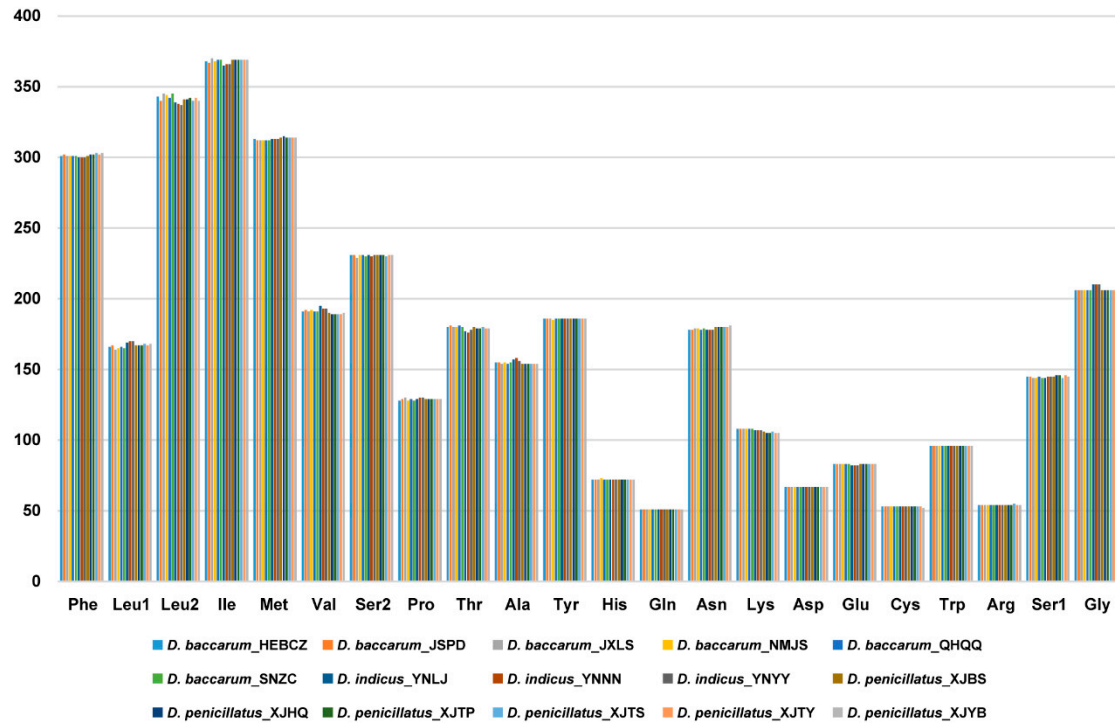

**Figure S1.** Patterns of codon usage in the mitogenomes of the *Dolycoris*. The X-axis shows the codon families and the Y-axis shows the total codons.

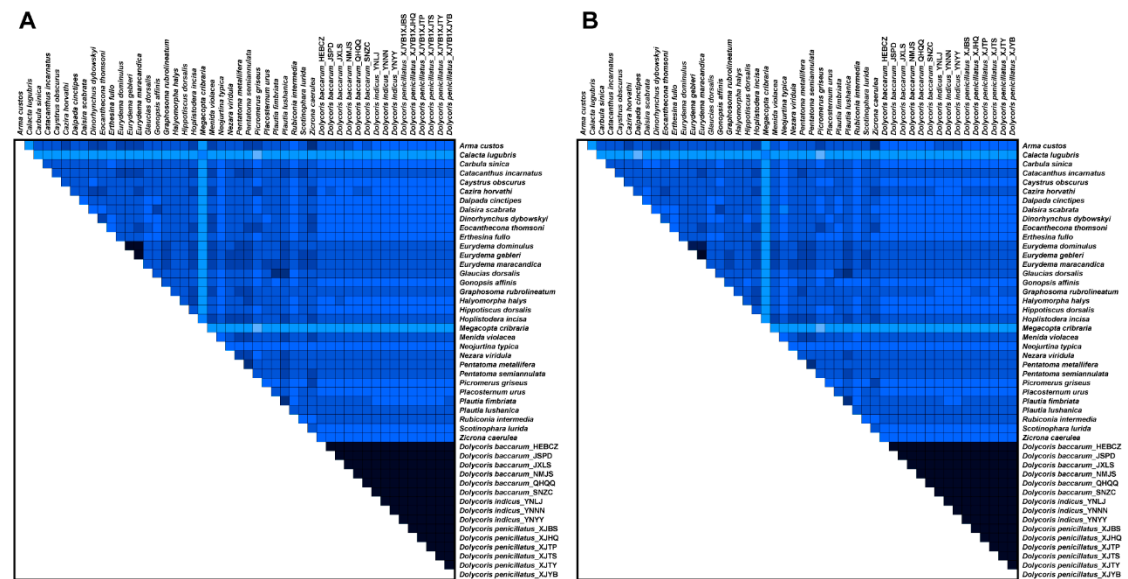

**Figure S2.** Heterogeneity analysis of dataset PCG123R (A) and PCG12R (B). The mean similarity score between sequences is represented by a colored square, based on the AliGROOVE scores ranging from  $-1$ , indicating a large difference in rates from the remainder of the dataset (red coloration), to  $+1$ , indicating rates match all other comparisons (blue coloration).

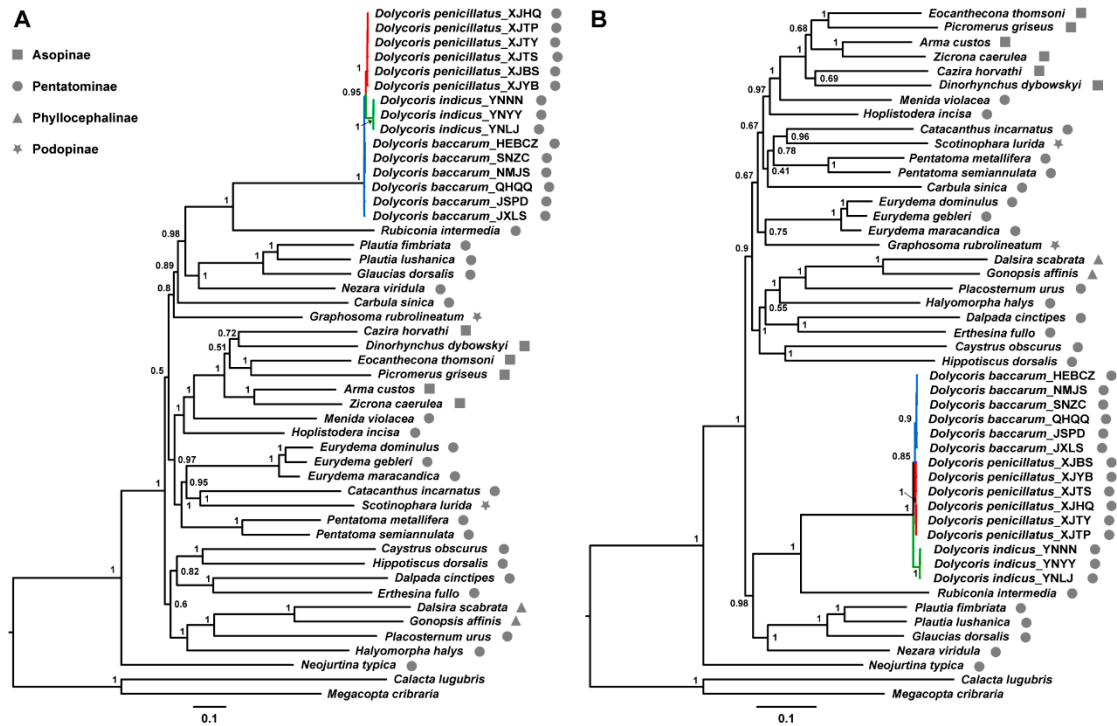

**Figure S3.** Phylogenetic trees of Pentatomidae inferred by BI analysis based on dataset PCG123R (A) and PCG12R (B). Numbers at the nodes are posterior probabilities.
